# Supplementary material for: Evidence for validity of a national physician and patient-reported, cross-sectional survey in China and UK: the Disease Specific Programme
Source: PubMed Central journal article supplement — BMJ Open. 2016 Aug 15;6(8):e010352. doi: 10.1136/bmjopen-2015-010352 (PMC5013497; doi:10.1136/bmjopen-2015-010352), 2016-08-15
Supplement: bmjopen-2015-010352supp_appendix2.pdf [file bmjopen-2015-010352supp_appendix2.pdf]

## Appendix 2: Questions on physician-completed survey form in UK

### A DEMOGRAPHICS

2. Age \_\_\_\_\_ years OR  if age is 90+
3. Gender  Male  Female
4. Patient's height \_\_\_\_\_ cm
5. Patient's current weight \_\_\_\_\_ kg
13. Smoking status:
- Smoker  Non-smoker  Ex-smoker  Don't know

### B PATIENT DIABETES DIAGNOSIS AND CONDITION

- 1a. How long is it since this patient was first diagnosed as a Type 2 Diabetic?  
(write in a number and circle units OR  diagnosed at latest visit OR don't know)
- \_\_\_\_\_ weeks months years (circle as appropriate)
- OR  Diagnosed at this latest visit
- OR  Don't know

### C TESTS CONDUCTED IN LAST 12 MONTHS

3. State for each test conducted in the last 12 months: i) the most recent test result.

|                   |                                                                               |
|-------------------|-------------------------------------------------------------------------------|
|                   | 3i) Enter most recent test result & <input checked="" type="checkbox"/> units |
| HbA1c             | <input type="checkbox"/> %<br><input type="checkbox"/> mmol/mol               |
| Blood Pressure    | Systolic _____ mm Hg<br>Diastolic _____ mm Hg                                 |
| Total cholesterol | <input type="checkbox"/> mg/dL<br><input type="checkbox"/> mmol/L             |

### F ANTI-DIABETIC TREATMENT HISTORY

2. Please provide details of ALL of the patient's CURRENT antidiabetic drug therapy at the most recent consultation even if not prescribed at this visit (non-insulin orals and/or injectables and insulins).

CURRENT DRUG/INSULIN NAME(S)

- 1) \_\_\_\_\_
- 2) \_\_\_\_\_
- 3) \_\_\_\_\_
- 4) \_\_\_\_\_

### Q CONSULTATION

3. How many times have you seen this patient in the last 12 months:
- a. for any reason? \_\_\_\_\_ times
