# Supplementary figures and images for: Evidence for validity of a national physician and patient-reported, cross-sectional survey in China and UK: the Disease Specific Programme
Source: PubMed Central journal article supplement — BMJ Open. 2016 Aug 15;6(8):e010352. doi: 10.1136/bmjopen-2015-010352 (PMC5013497; doi:10.1136/bmjopen-2015-010352), 2016-08-15

**Supplementary figure 1.** The stages of a Disease Specific Programme (DSP)

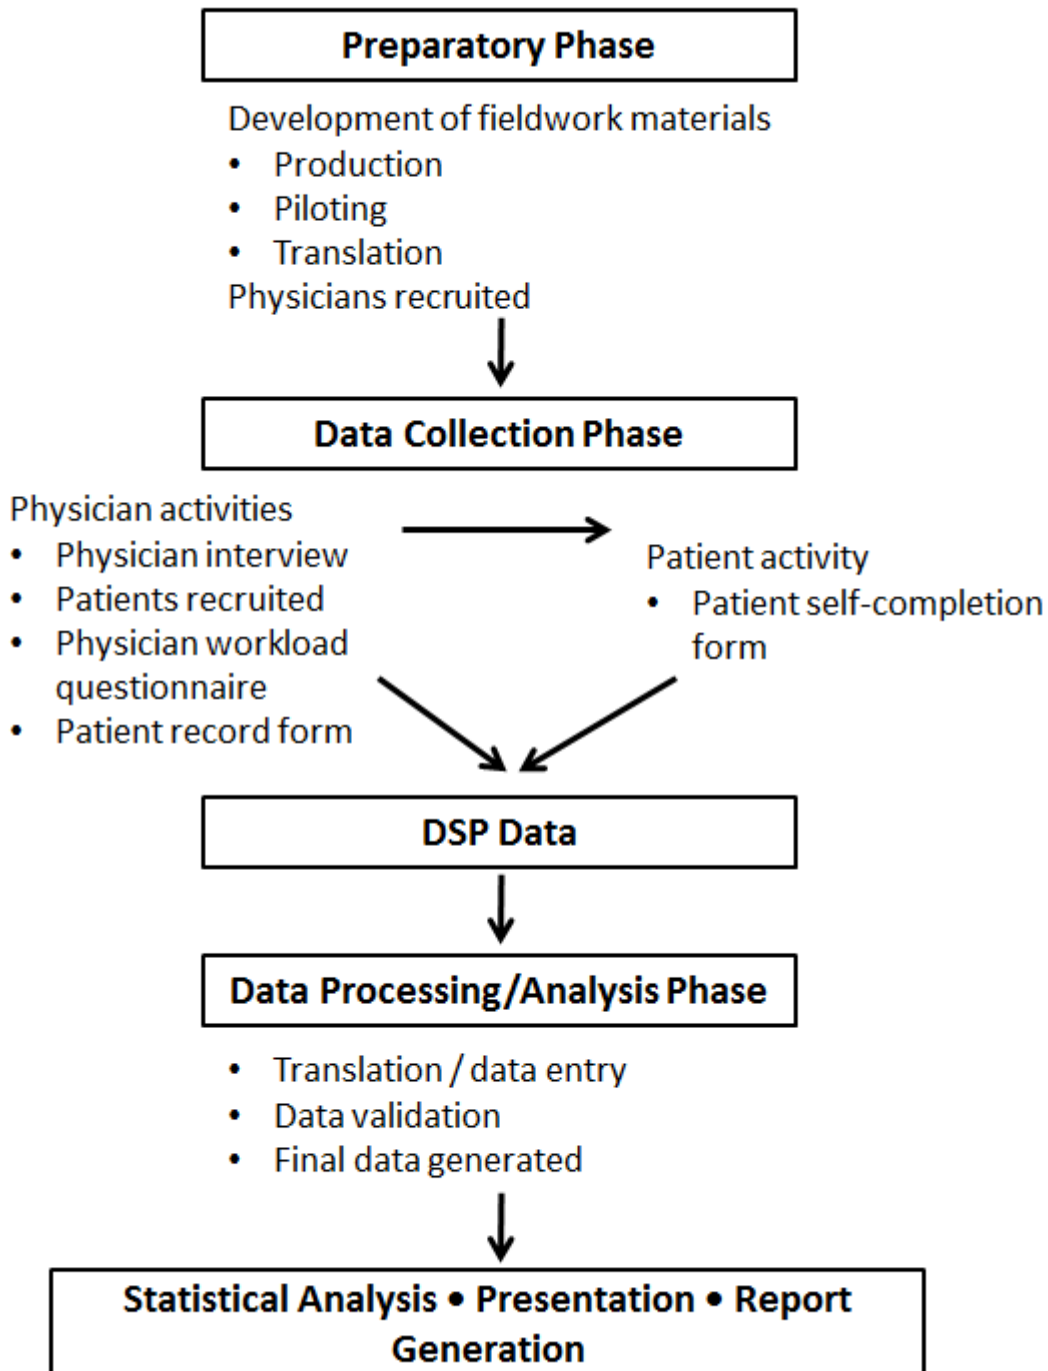

Supplement: bmjopen-2015-010352supp_figure.pdf [file bmjopen-2015-010352supp_figure.pdf]
